# Supplementary material for: Plasmonic enhancement of nitric oxide generation
Source: Royal Society of Chemistry journal article supplement (doi:10.1039/d1nr02126e), 2021-01-01
Supplement: d1nr02126e1.pdf [file d1nr02126e1.pdf]

# Plasmonic Enhancement of Nitric Oxide Generation

*Rachael Knoblauch and Chris D. Geddes\**

Institute of Fluorescence and Department of Chemistry and Biochemistry, University  
of Maryland Baltimore County, 701 East Pratt Street, Baltimore, Maryland 21202,

USA

\*all correspondence: [geddes@umbc.edu](mailto:geddes@umbc.edu)

***Electronic Supplementary Information***

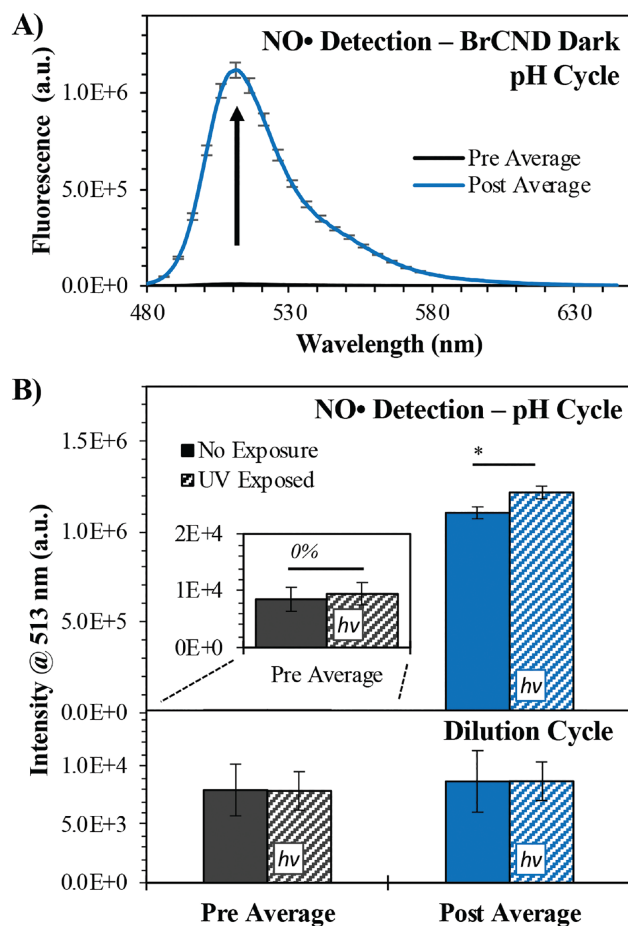

**Fig. S1.** Nitric oxide (NO•) detection from brominated carbon nanodots (BrCND) under pH cycled conditions. Detection was completed using diaminofluorescein-FM (DAF-FM) probe both “pre” and “post” acid cycling conditions, either under dark or UV-exposed ( $\lambda_{ex} = 365$  nm,  $0.56 \pm 0.04$  mW) conditions. *A)* Fluorescence spectra of NO• detection under dark conditions. *B)* Average intensities from  $n = 3$  trials, with error from standard deviation ( $*p < 0.05$ ). Reproduced from Ref. [S1] with permission from The Royal Society of Chemistry.

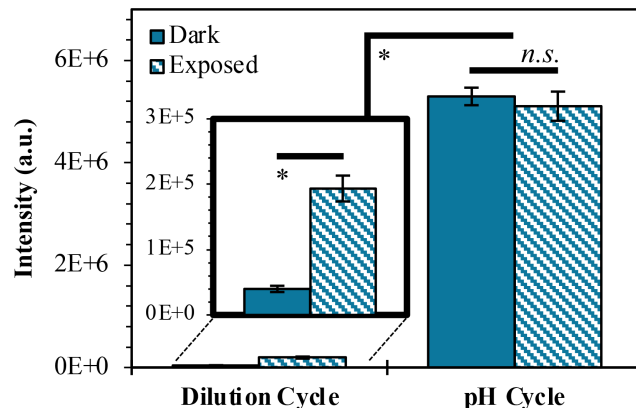

**Fig. S2.** Photodynamic release of nitric oxide (NO•) from brominated carbon nanodots (BrCND) as detected by *fluorescence-on* probe DAF-FM. Release was detected after 4 minutes of either dark or UV exposure (“Exposed,”  $\lambda_{\text{ex}} = 365 \text{ nm}$ ,  $580 \pm 20_{(\text{SD})} \mu\text{W}$ ) in blank 96-well plates, both under dilution (pH  $\sim 12$ -12.5) and pH cycled (pH  $< 3$ ) conditions.  $N = 5$ ,  $*P \ll 0.001$ , error from standard deviation.

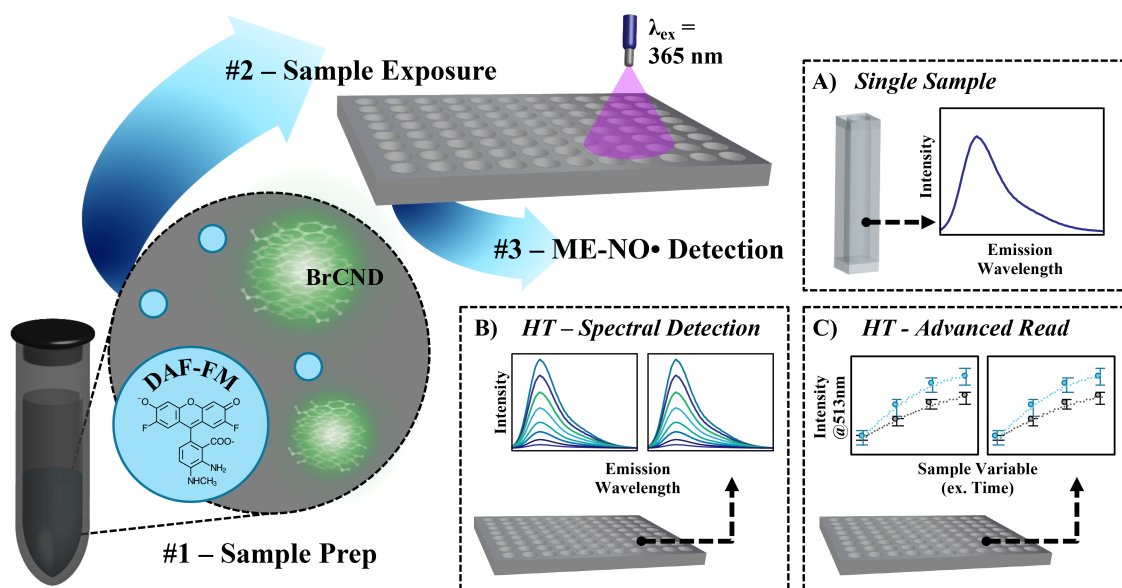

**Fig. S3.** Schematic of the different detection methods of metal-enhanced nitric oxide (ME-NO•) photodynamic release from brominated carbon nanodots (BrCND), using the *fluorescence-on* probe DAF-FM. Methods include (A) single sample, (B) high-throughput (HT) spectral detection, and (C) HT advanced read, with detection occurring at 513 nm (error from standard deviation of  $N = 5$  sample scans).

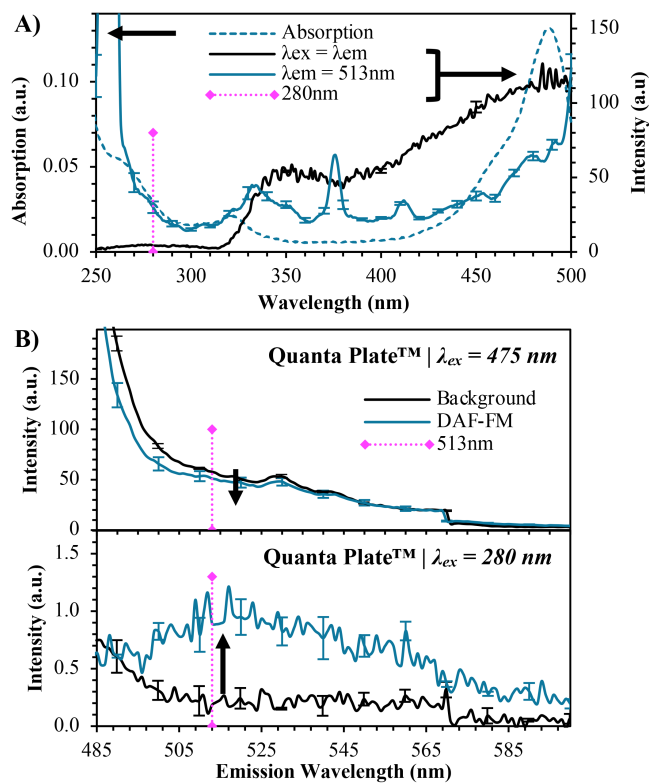

**Fig. S4.** Selection of excitation parameters for metal-enhanced detection of nitric oxide ( $\text{NO}^\bullet$ ) release. (A) Spectral overlay of DAF-FM absorption (detected in blank plate, dashed blue line), excitation (detected in Quanta Plate™,  $\lambda_{em} = 513\text{ nm}$ , solid blue line) profiles versus Quanta Plate™ well synchronous scattering profile ( $\lambda_{ex} = \lambda_{em}$ ). (B) Background excitation scattering versus DAF-FM ( $10\ \mu\text{M}$ ) emission in Quanta Plate™ wells at  $\lambda_{ex} = \text{top} - 475$  and  $\text{bottom} - 280\text{ nm}$ . Arrows indicate signal change relative to background excitation scattering. All error from standard deviation from  $N = 3$  measurements.

**Table S1.** Metal-Enhanced Generation or Release of Reactive Species.

| Species Detected                                   | Plasmonic Substrate        | Reactive Species Donor     | Enhancement Factor | [Ref.] |
|----------------------------------------------------|----------------------------|----------------------------|--------------------|--------|
| Singlet Oxygen ( $^1\text{O}_2$ )                  | Silver Island Films (SiFs) | Acridine                   | ~2                 | [S2]   |
|                                                    |                            | Rose Bengal                | ~3                 |        |
|                                                    |                            | Chloroquine                | ~6                 |        |
|                                                    |                            | Indomethacin               | ~2                 |        |
|                                                    |                            | Riboflavin                 | ~4                 |        |
|                                                    |                            | Naproxen                   | ~17                |        |
|                                                    |                            | Chlorpromazine             | ~21                |        |
| Quinidine                                          | ~26                        |                            |                    |        |
| $^1\text{O}_2$                                     | SiFs                       | $\text{C}_{60}$            | ~ 5 - 35           | [S3]   |
| $^1\text{O}_2$                                     | SiFs                       | Rose Bengal                | ~ 2 - 10           | [S4]   |
| $^1\text{O}_2$                                     | Quanta Plates™             | Brominated Carbon Nanodots | ~ 2                | [S5]   |
| Superoxide anion radical ( $\text{O}_2^{\cdot-}$ ) | SiFs                       | Acridine                   | ~ 4 - 6            | [S4]   |

**Table S2.** Parameters and Analysis from Varied Energy Density Experiments (Fig. 3).

| Fig. | [DAF-FM] ( $\mu\text{M}$ ) | Time ( $t$ , sec)          | Power ( $P$ , $\mu\text{W}$ )                                                            | Surface Area ( $SA$ , $\text{mm}^2$ )                                          | Linear Fit, Slope ( $\text{J}^{-1}\cdot\text{m}^2$ ) |
|------|----------------------------|----------------------------|------------------------------------------------------------------------------------------|--------------------------------------------------------------------------------|------------------------------------------------------|
| 3A   | 7 $\mu\text{M}$            | 0-240 sec<br>int. = 80 sec | $540 \pm 20_{(\text{SD})}$                                                               | 100% (40 $\text{mm}^2$ )                                                       | $-0.0001 \pm 0.0001_{(\text{SE})}$                   |
| 3B   | 7 $\mu\text{M}$            | 80 sec                     | $580 \pm 30_{(\text{SD})}$<br>$950 \pm 140_{(\text{SD})}$<br>$1590 \pm 60_{(\text{SD})}$ | 100% (40 $\text{mm}^2$ )                                                       | $3\cdot 10^{-6} \pm 30\cdot 10^{-6}_{(\text{SE})}$   |
| 3C   | 7 $\mu\text{M}$            | 80 sec                     | $570 \pm 20_{(\text{SD})}$                                                               | 35% (14 $\text{mm}^2$ )<br>55% (21 $\text{mm}^2$ )<br>100% (40 $\text{mm}^2$ ) | $27\cdot 10^{-5} \pm 2\cdot 10^{-5}_{(\text{SE})}$   |
| 3E   | 1-100 $\mu\text{M}$        | 80 sec                     | $560 \pm 20_{(\text{SD})}$                                                               | 100% (40 $\text{mm}^2$ )                                                       | N/A                                                  |

The reader is referred to Fig. 3A-C,E of the main text.  
“int.” = interval

**Table S3.** Timescales for Detection of Metal-Enhanced Nitric Oxide Release.

| Method        | Preparation / Exposure | Analysis (Single Trial, <i>N</i> )        | Analysis (All Samples, <i>N</i> )          | Total Time |
|---------------|------------------------|-------------------------------------------|--------------------------------------------|------------|
| Single sample | ~ 15 min               | ~ 3 min, <i>N</i> = 1                     | ~ 1.6 hr, <i>N</i> = 32                    | ~ 2 hr     |
| HT, spectral  | ~ 15 min               | 12 ± 1 <sup>a</sup> min, <i>N</i> = 16    | 25 ± 2 <sup>b</sup> min, <i>N</i> = 32     | ~ 40 min   |
| HT, adv read  | ~ 15 min               | 6.3 ± 0.4 <sup>c</sup> min, <i>N</i> = 16 | 12.6 ± 0.8 <sup>d</sup> min, <i>N</i> = 32 | ~ 30 min   |

<sup>a</sup> *N* = 4 timed trials, error from standard deviation

<sup>b</sup> Error propagated from (a)

<sup>c</sup> *N* = 4 timed trials, error from standard deviation

<sup>d</sup> Error propagated from (c)

*HT* – High throughput, *N* = 5 averaged scan per spectrum

*Adv read* – advanced read, *N* = 5 averaged scans at 513nm

---

## ESI References

1. R. Knoblauch, A. Harvey, C.D. Geddes, Antimicrobial carbon nanodots: photodynamic inactivation and dark antimicrobial effects on bacteria by brominated carbon nanodots. *Nanoscale* 13, 85-99 (2021). doi:10.1039/D0NR06842J
2. Y. Zhang, K. Aslan, M.J.R. Previte, C.D. Geddes, Plasmonic engineering of singlet oxygen generation. *Proc. Natl. Acad. Sci. U.S.A.* 105, 1798-1802 (2008).
3. X. Ragàs, A. Gallardo, Y. Zhang, W. Massad, C.D. Geddes, S. Nonell, Singlet oxygen production enhancement by silver island films. *J. Phys. Chem. C.* 115, 16275-16281 (2011).
4. J. Karolin, C.D. Geddes, Metal-enhanced fluorescence based excitation volumetric effect of plasmon-enhanced singlet oxygen and superoxide generation. *Phys. Chem. Chem. Phys.* 15, 15740-15745 (2013).
5. R. Knoblauch, A. Harvey, C.D. Geddes, Metal-enhanced photosensitization of singlet oxygen (ME<sup>1</sup>O<sub>2</sub>) from brominated carbon nanodots on silver nanoparticle substrates. *Nanoscale* in submission (2021).
